# Supplementary material
Source: MDPI journal article supplement (https://www.mdpi.com/2227-9091/8/4/111)

Unconstrained Lognormal Model for T5

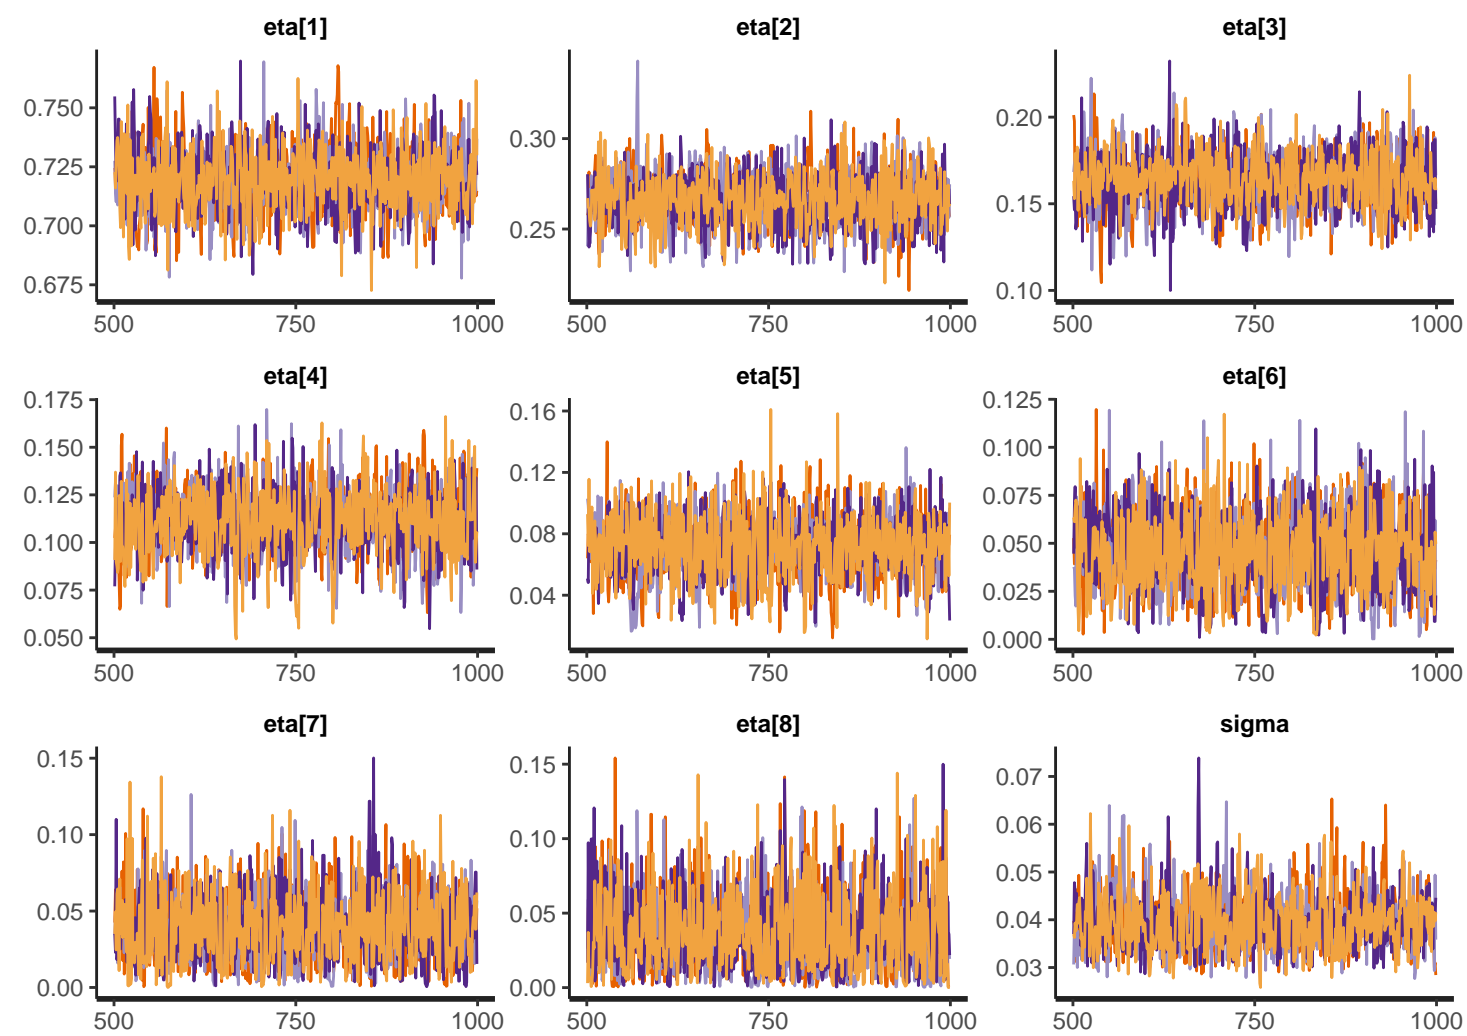

Unconstrained Gamma Model for T8

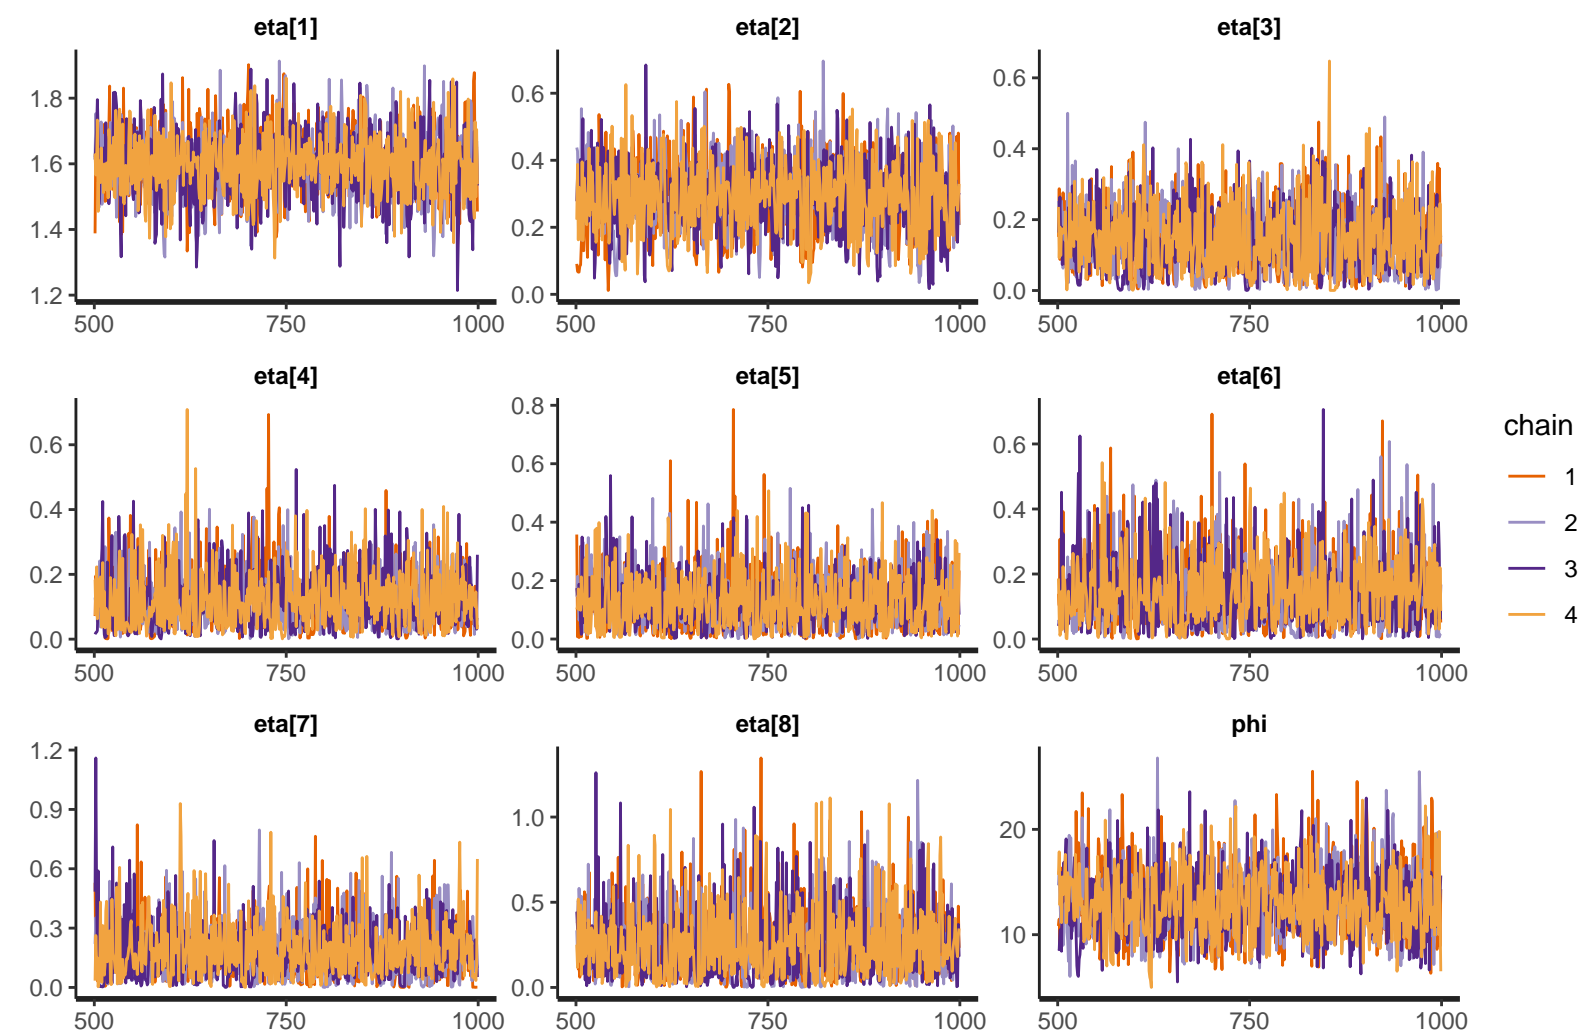

Constrained Lognormal Model for T1

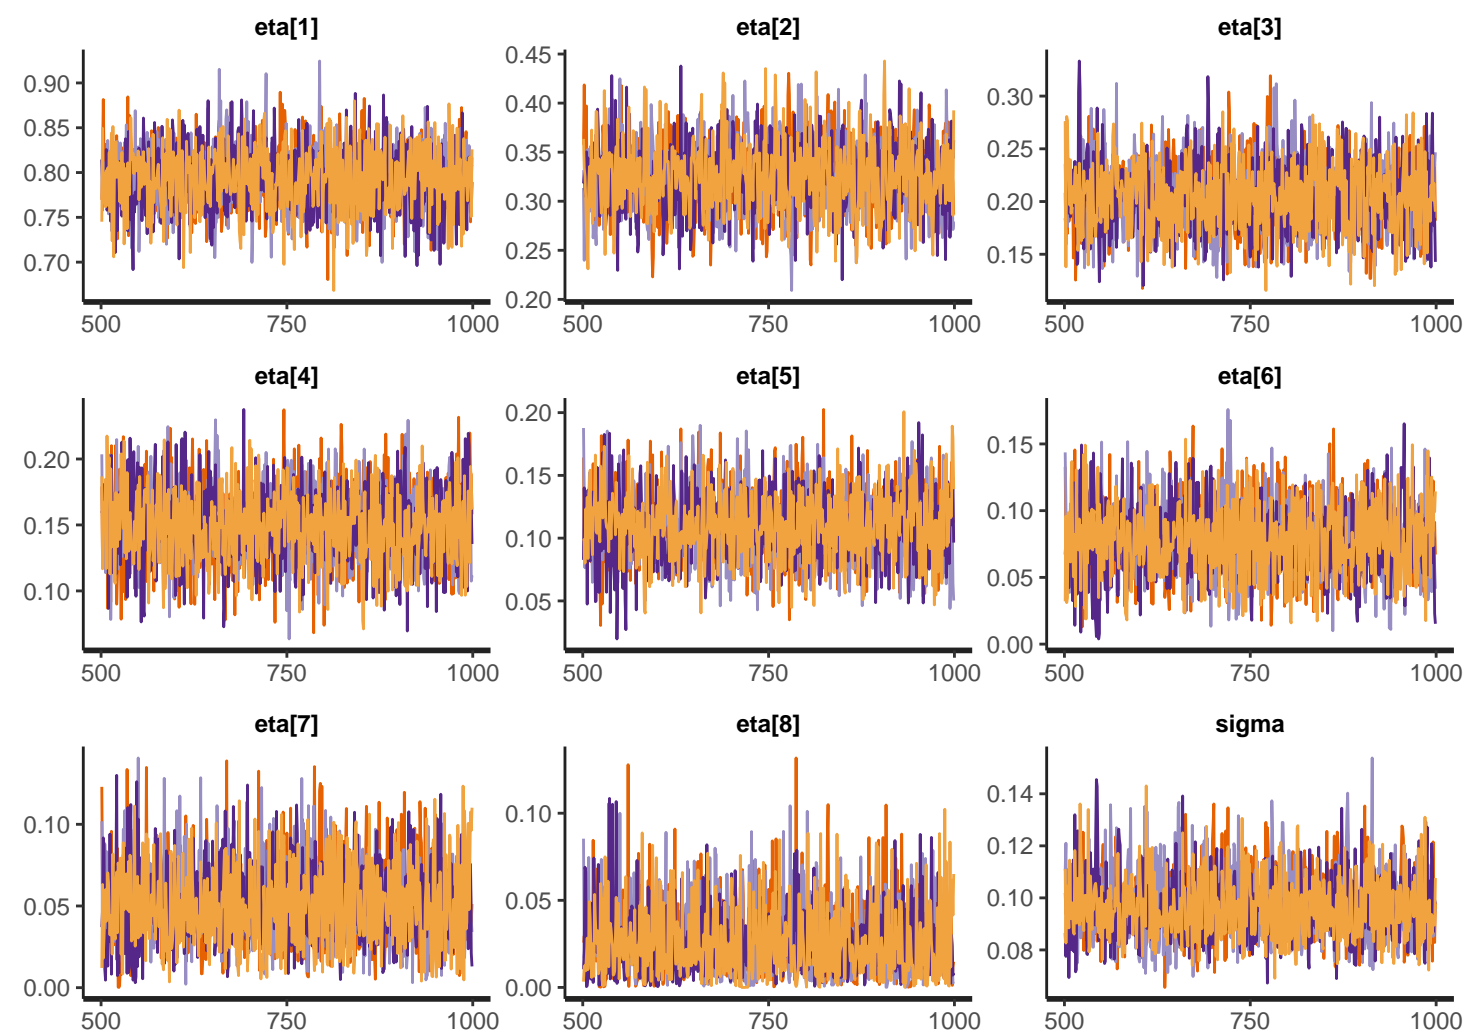

Constrained Gamma Model for T4

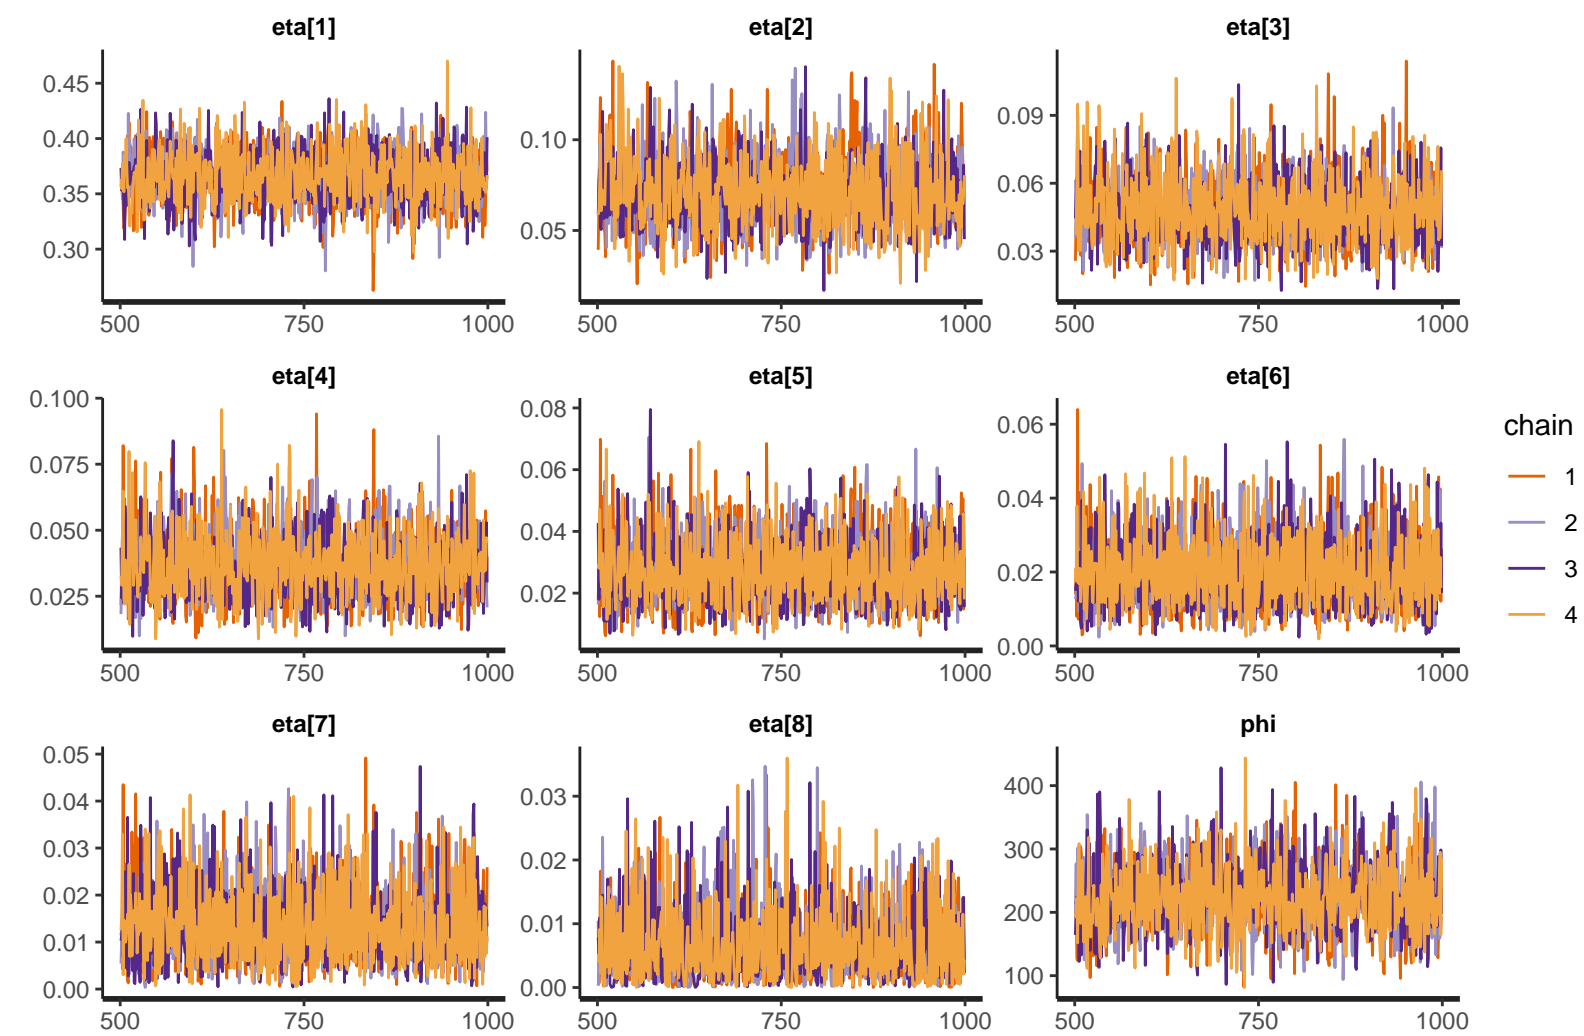

Supplement: s1 [file s1]
