# Supplementary material
Source: MDPI journal article supplement (https://www.mdpi.com/2227-9091/8/4/111)

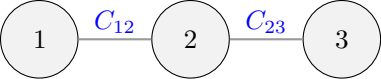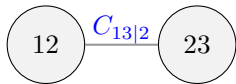

(a)

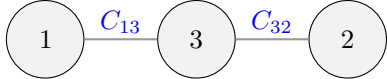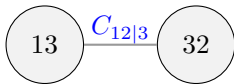

(b)

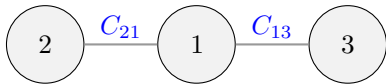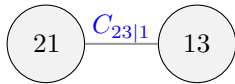

(c)

Supplement: s1 [file s1]

Tree 1

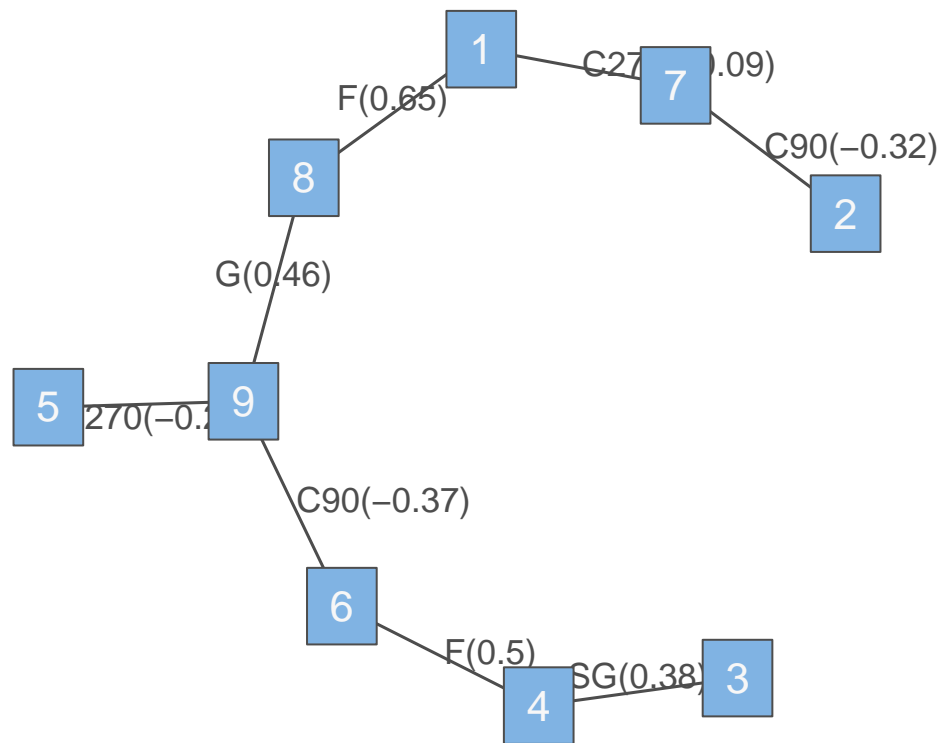

Supplement: s1 [file s1]

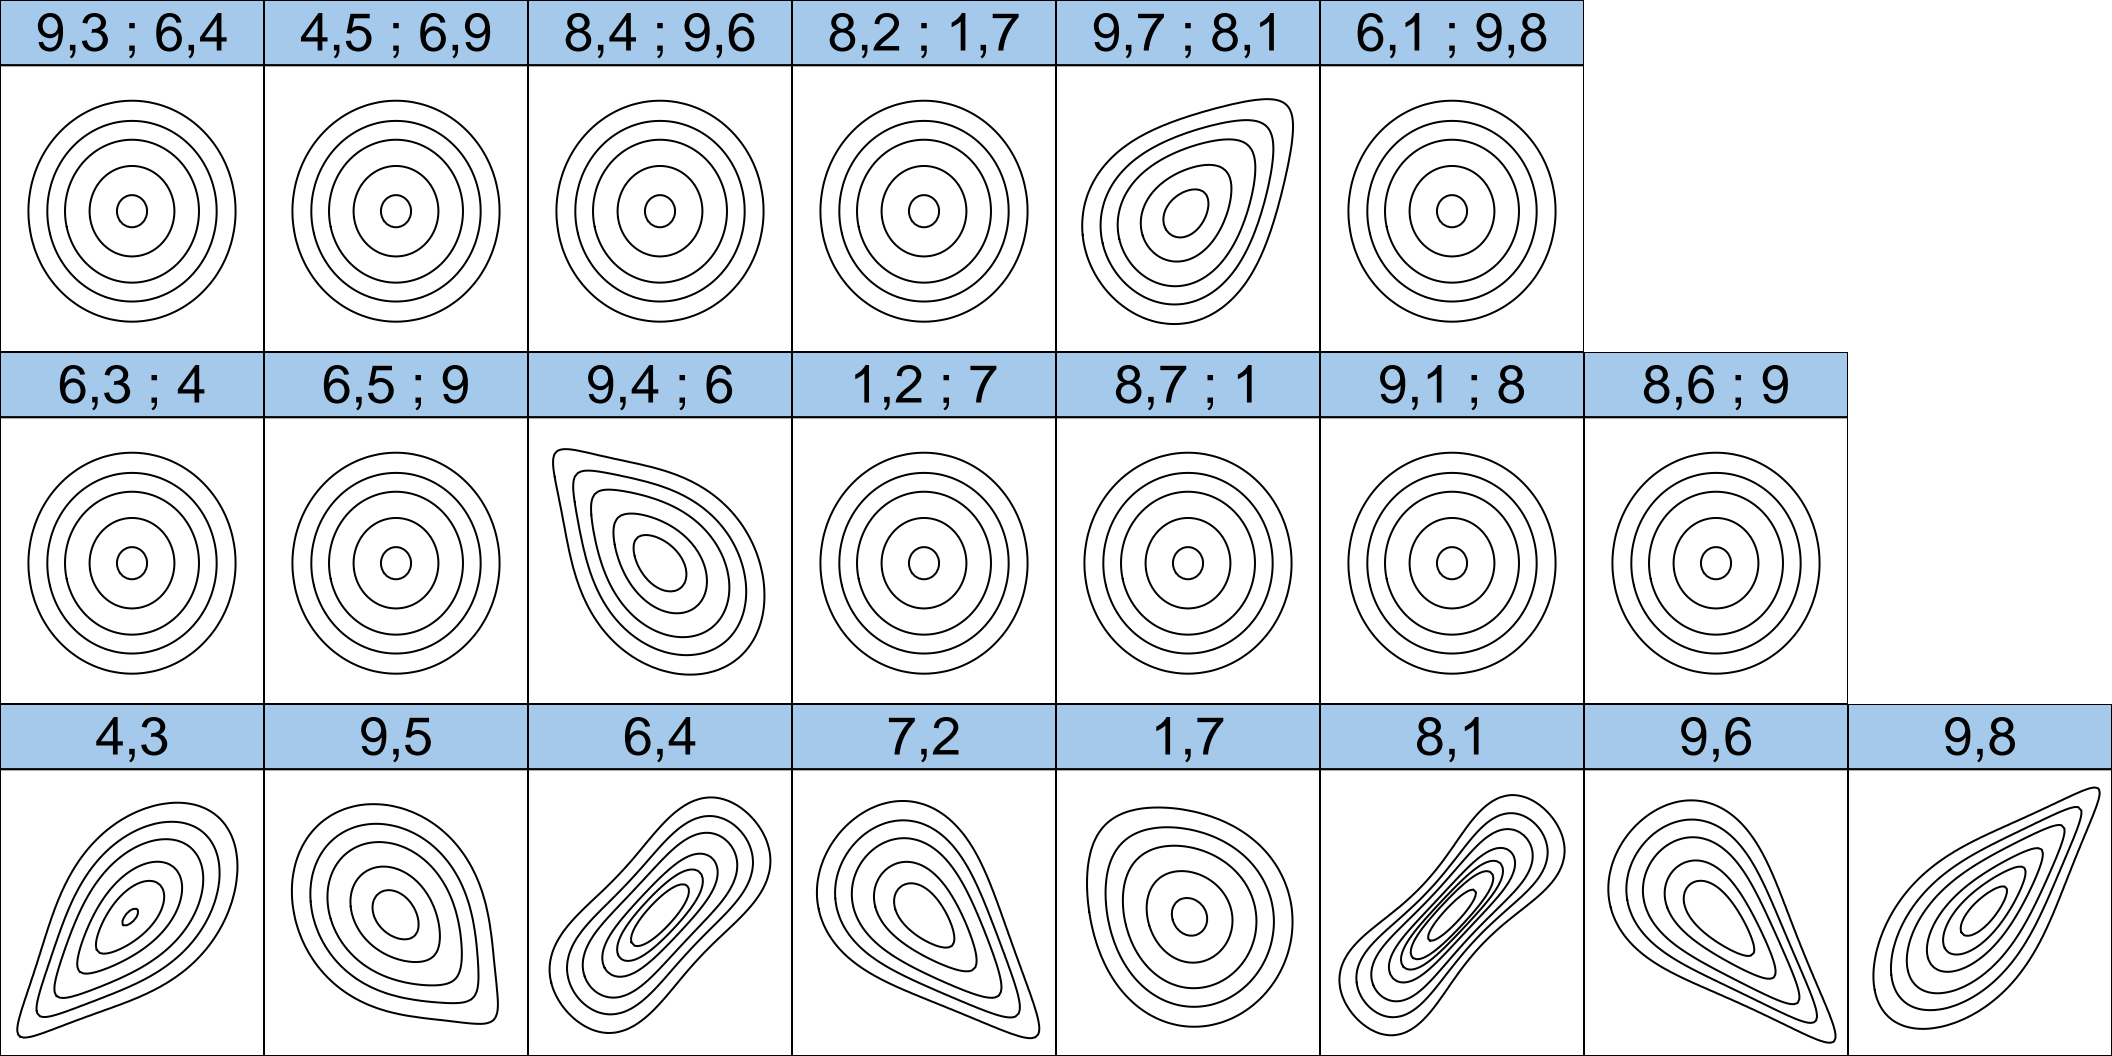

Supplement: s1 [file s1]

Kernel density

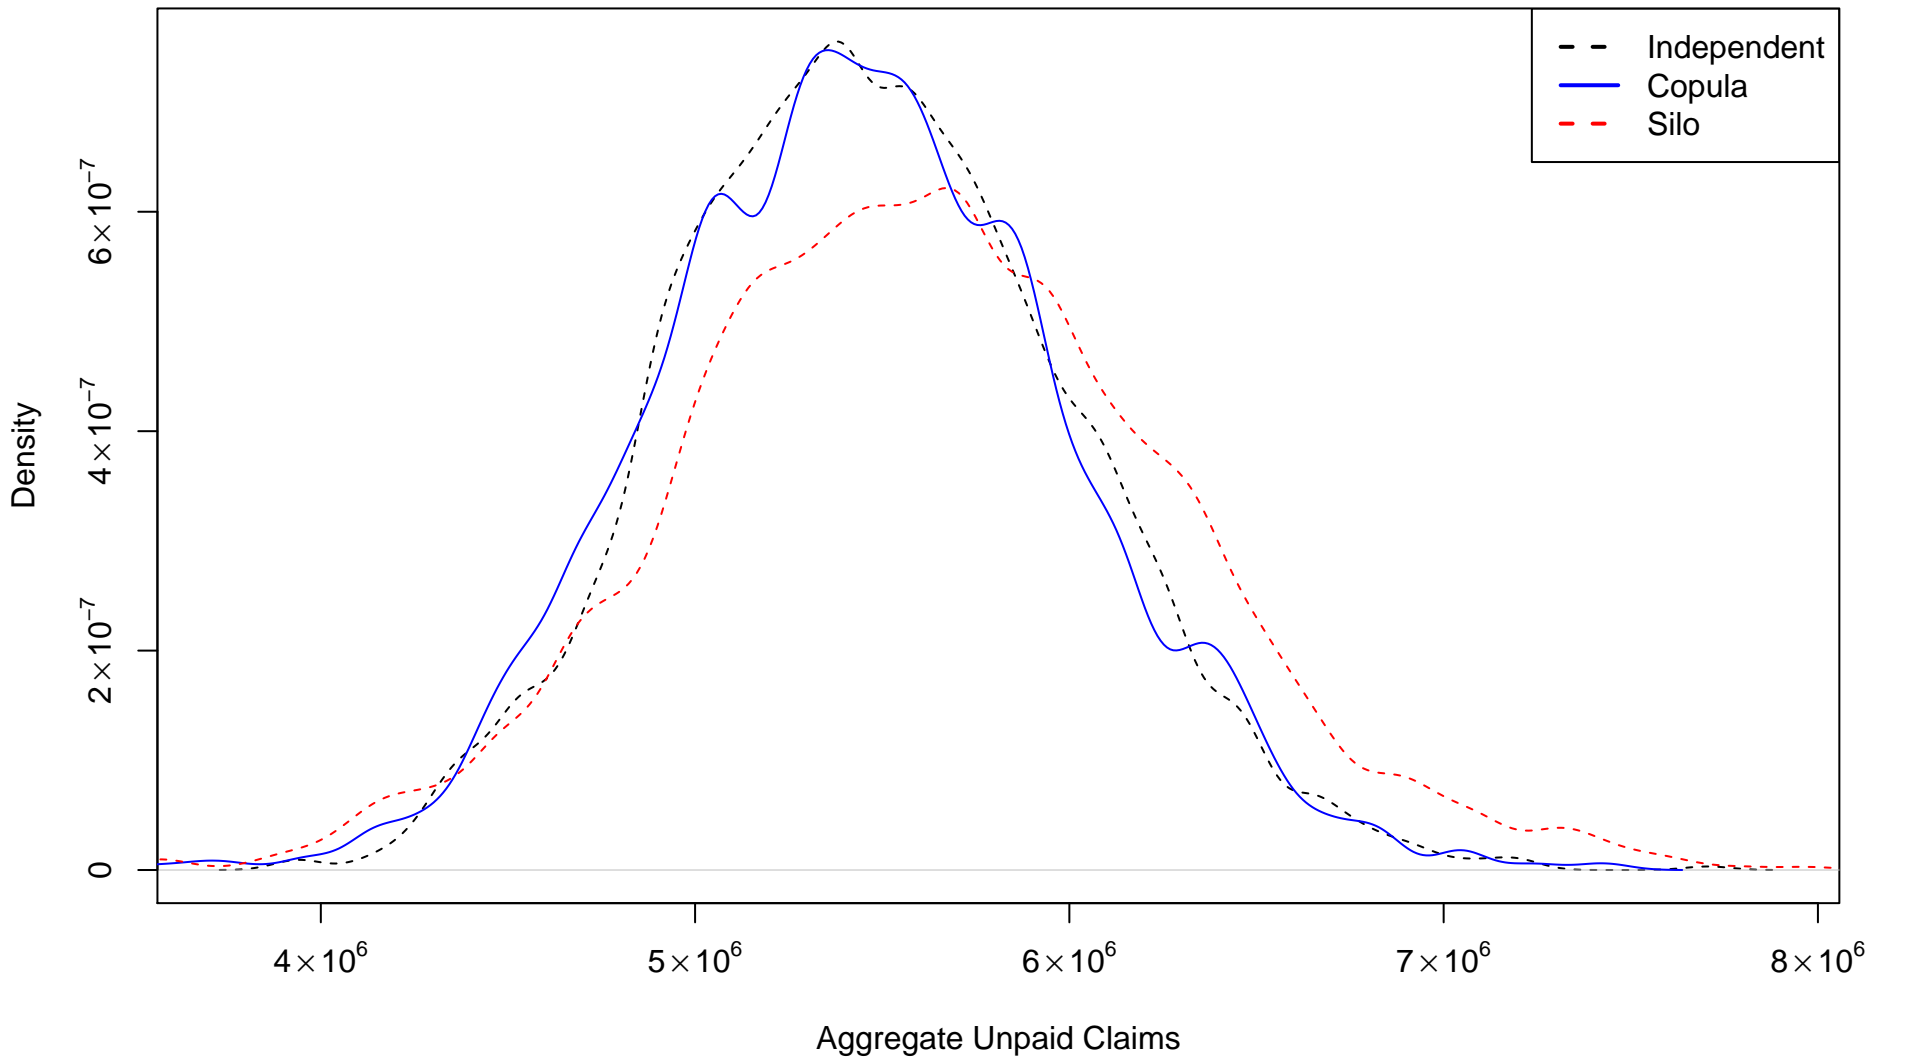

Supplement: s1 [file s1]
